# Supplementary material
Source: Springer Nature journal article supplement (https://www.springermedizin.de/resource/supplementary/12960_2004_28_MOESM4_ESM.pdf/9570244)
Supplement: MOESM4 [file 9570244]

**MECHANISMS:**

**CENTRAL LEVEL**

**PROGRAM**

CONCERT

**TEACHERS**

**TEACHING**

COORDINATION  
REINFORCEMENT

**STUDENTS**

**LEARNING**

ANALYSIS

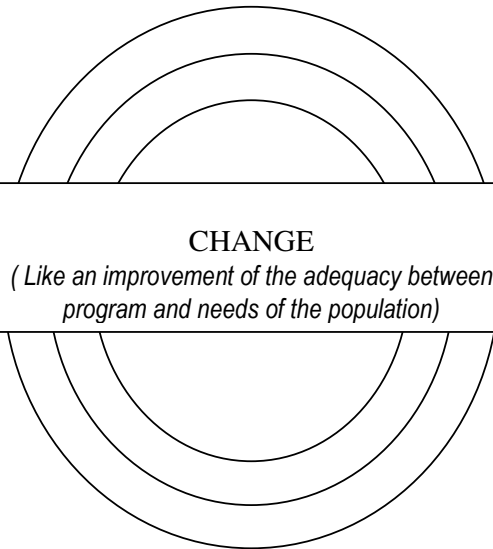

**CHANGE**

*( Like an improvement of the adequacy between  
program and needs of the population )*
